# Supplementary material
Source: MDPI journal article supplement (https://www.mdpi.com/2311-5637/10/3/143)
Supplement: s1 [file s1]

## Supplementary Material

**Table S1.** Species of fungi evaluated in studies on bioremediation in industrial effluents.

| Species evaluated                  | Number of articles | Species evaluated                  | Number of articles |
|------------------------------------|--------------------|------------------------------------|--------------------|
| <i>Abortiporus biennis</i>         | 3                  | <i>Lentinus crinitus</i>           | 1                  |
| <i>Agrocybe cylindracea</i>        | 1                  | <i>Lentinus tigrinus</i>           | 2                  |
| <i>Anthracophyllum discolor</i>    | 1                  | <i>Macrolepiota excoriata</i>      | 1                  |
| <i>Aspergillus sp.</i>             | 2                  | <i>Mucor</i>                       | 1                  |
| <i>Aspergillus uvarum</i>          | 1                  | <i>Paecilomyces</i>                | 1                  |
| <i>Auricularia auricula-judae</i>  | 1                  | <i>Panellus stipticus</i>          | 1                  |
| <i>Bjerkandera adusta</i>          | 4                  | <i>Panus conchatus</i>             | 1                  |
| <i>Botrytis cinerea</i>            | 1                  | <i>Panus tigrinus</i>              | 3                  |
| <i>Ceriporiopsis subvermispora</i> | 2                  | <i>Penicillium commune</i>         | 1                  |
| <i>Coriolopsis byrsina</i>         | 1                  | <i>Penicillium sp</i>              | 2                  |
| <i>Coriolopsis gallica</i>         | 2                  | <i>Peniophora cinerea</i>          | 1                  |
| <i>Coriolopsis polyzona</i>        | 1                  | <i>Phanerochaete chrysosporium</i> | 32                 |
| <i>Coriolopsis rigida</i>          | 2                  | <i>Phanerochaete flavido-alba</i>  | 4                  |
| <i>Coriolus versicolor</i>         | 5                  | <i>Phlebia radiata</i>             | 1                  |
| <i>Daedalea flavida</i>            | 1                  | <i>Phlebia rufa</i>                | 1                  |
| <i>Daedalea quercina</i>           | 1                  | <i>Phlebia sp.</i>                 | 1                  |
| <i>Dichomitus squalens</i>         | 3                  | <i>Phlebia subochracea</i>         | 1                  |
| <i>Flammulina velutipes</i>        | 1                  | <i>Pholiota nameko</i>             | 1                  |
| <i>Flavodon flavus</i>             | 1                  | <i>Picnoporus cinnabarinus</i>     | 2                  |
| <i>Fomes fomentarius</i>           | 1                  | <i>Pleurotus citrinopileatus</i>   | 1                  |
| <i>Fomitiporia punctata</i>        | 1                  | <i>Pleurotus djamor</i>            | 1                  |
| <i>Funalia trogii</i>              | 2                  | <i>Pleurotus eryngii</i>           | 3                  |
| <i>Ganoderma resinaceum</i>        | 1                  | <i>Pleurotus levis</i>             | 1                  |
| <i>Ganoderma applanatum</i>        | 1                  | <i>Pleurotus ostreatoroseus</i>    | 1                  |
| <i>Ganoderma australe</i>          | 1                  | <i>Pleurotus ostreatus</i>         | 21                 |
| <i>Ganoderma carnosum</i>          | 1                  | <i>Pleurotus pulmonarius</i>       | 2                  |
| <i>Ganoderma lucidum</i>           | 3                  | <i>Pleurotus sajor caju</i>        | 6                  |
| <i>Ganoderma pfeifferi</i>         | 1                  | <i>Pleurotus sp</i>                | 2                  |
| <i>Ganoderma resinaceum</i>        | 3                  | <i>Phlebia radiata</i>             | 1                  |

|                                |    |                                              |   |
|--------------------------------|----|----------------------------------------------|---|
| <i>Ganoderma tsugae</i>        | 1  | <i>Phlebia rufa</i>                          | 1 |
| <i>Geotrichum candidum</i>     | 1  | <i>Phlebia sp.</i>                           | 1 |
| <i>Grammothele subargentea</i> | 1  | <i>Phlebia subochracea</i>                   | 1 |
| <i>Grifola frondosa</i>        | 1  | <i>Polyporus ciliatus</i>                    | 1 |
| <i>Hericium erinaceus</i>      | 3  | <i>Polyporus sanguineus</i>                  | 1 |
| <i>Hericium alpestre</i>       | 1  | <i>Polyporus tuberaster</i>                  | 1 |
| <i>Hypholoma lateritium</i>    | 1  | <i>Poria subvermispora</i>                   | 1 |
| <i>Inonotus andersonii</i>     | 1  | <i>Pycnoporus</i><br><i>cinnabarinus</i>     | 5 |
| <i>Inonotus hispidus</i>       | 1  | <i>Pycnoporus coccineus</i>                  | 1 |
| <i>Inonotus nodulosus</i>      | 1  | <i>Pycnoporus</i><br><i>sanguineus</i>       | 1 |
| <i>Irpex flavus</i>            | 1  | <i>Stereum hirsutum</i>                      | 2 |
| <i>Irpex lacteus</i>           | 4  | <i>Trametes villosa</i>                      | 2 |
| <i>Laetiporus sulphureus</i>   | 1  | <i>Trichoderma</i><br><i>longibrachiatum</i> | 1 |
| <i>Lentinellus castoreus</i>   | 1  | <i>Tyromyces lacteus</i>                     | 1 |
| <i>Lentinula edodes</i>        | 12 | <i>Umbelopsis isabellina</i>                 | 1 |
